# Supplementary material for: Electrochemical Behavior of Reduced Graphene Oxide Supported Germanium Oxide, Germanium Nitride, and Germanium Phosphide as Lithium-Ion Battery Anodes Obtained from Highly Soluble Germanium Oxide
Source: MDPI journal article supplement (doi:10.3390/ijms24076860), 2023-04-06
Supplement: s1 [file s1]

# Electrochemical Behavior of Reduced Graphene Oxide Supported Germanium Oxide, Germanium Nitride, and Germanium Phosphide as Lithium-Ion Battery Anodes Obtained from Highly Soluble Germanium Oxide

Alexey A. Mikhaylov <sup>1</sup>, Alexander G. Medvedev <sup>1</sup>, Dmitry A. Grishanov <sup>2</sup>, Timur M. Fazliev <sup>1</sup>, Vasilii Chernyshev <sup>1</sup>, Elena A. Mel'nik <sup>1</sup>, Tatiana A. Tripol'skaya <sup>1</sup>, Ovadia Lev <sup>2,3</sup> and Petr V. Prikhodchenko <sup>1,\*</sup>

<sup>1</sup> Kurnakov Institute of General and Inorganic Chemistry, Russian Academy of Sciences, Leninskii prosp. 31, 119991 Moscow, Russia

<sup>2</sup> The Casali Center of Applied Chemistry, The Institute of Chemistry, The Hebrew University of Jerusalem, Jerusalem 9190401, Israel

<sup>3</sup> The Harvey M. Krueger Family Center for Nanoscience and Nanotechnology, The Hebrew University of Jerusalem, Edmond J. Safra Campus, Jerusalem 9190401, Israel

\* Correspondence: prikhman@gmail.com

## Material characterization

*Elemental analysis.* The composition of the active electrode material was determined by complementing analytical techniques. C, H, N contents were determined by using a Perkin-Elmer 2400 series II Analyzer.

*Scanning Electron Microscopy.* SEM imaging was performed using the Carl Zeiss NVision 40 High-Resolution Scanning Electron Microscope (Germany) and TESCAN AMBER GMH (Czech Republic). The specimen was prepared by depositing small amount of the powder on the conductive carbon tape.

*X-ray powder diffraction.* XRD measurements were performed on a D8 Advance Diffractometer (Bruker AXS, Karlsruhe, Germany). The powder samples were carefully filled into low background quartz sample holders. The specimen weight was approximately 0.5 g. XRD patterns from 5° to 75° 2θ were recorded at room temperature using CuKα radiation (1.5418 Å) under the following measurement conditions: tube voltage of 40 kV, tube current of 40 mA, step scan mode with a step size 0.02° 2θ and counting time of 1 s/step. XRD patterns were processed using DiffraC Plus software.

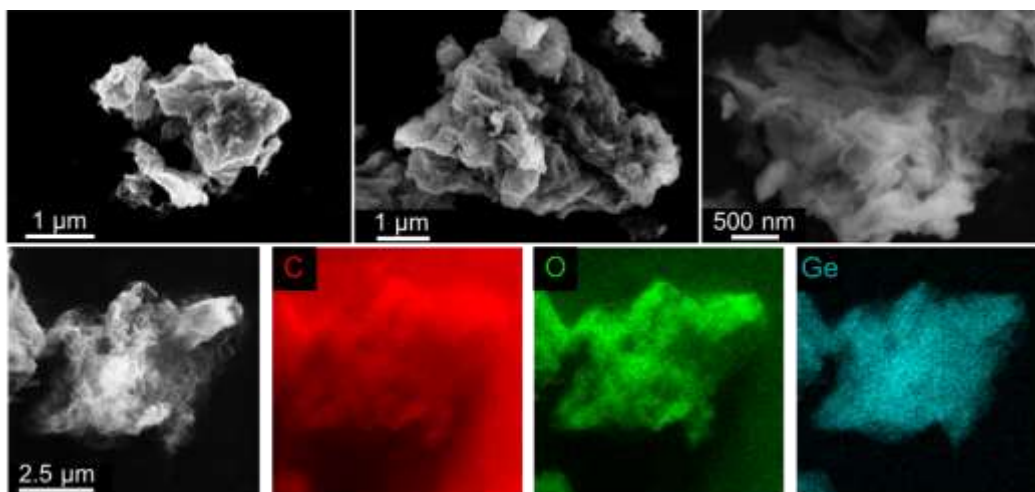

**Figure S1.** SEM of  $\text{GeO}_2\text{-GO-80}$  -upper row. Energy dispersive X-ray (EDX) mapping analysis of  $\text{GeO}_2\text{-rGO-80}$  composite lower row.

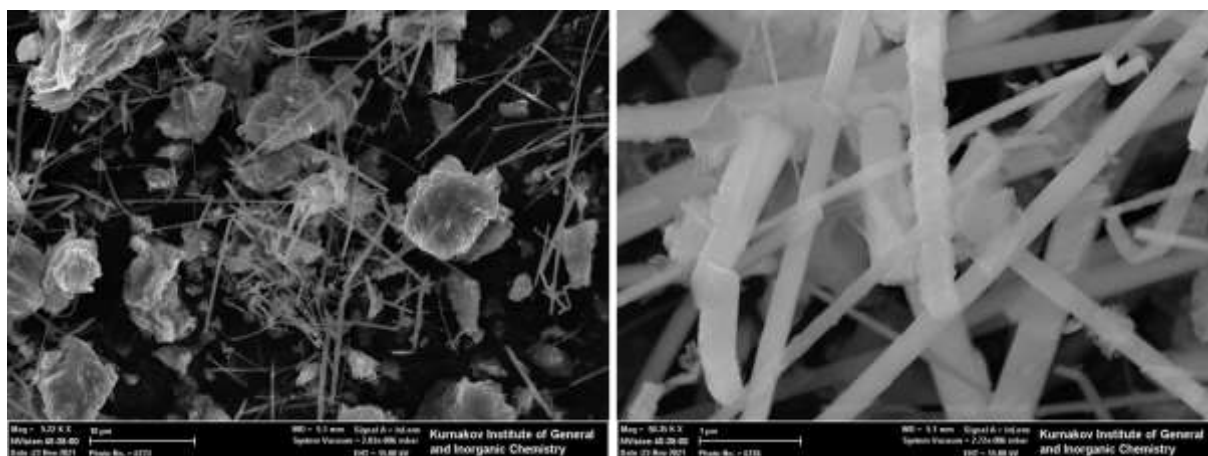

**Figure S2.** SEM of  $\text{Ge}_3\text{N}_4\text{-rGO}$  obtained by treatment at  $700^\circ\text{C}$  for 2 h.

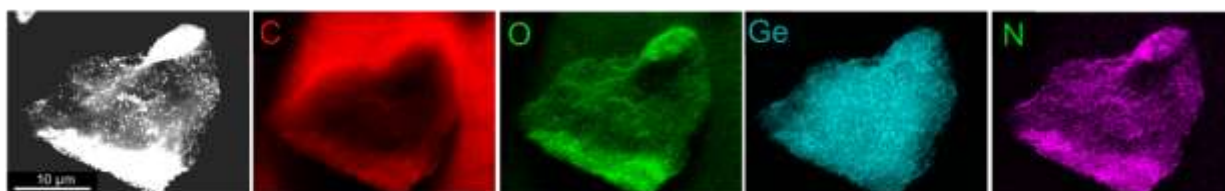

**Figure S3.** Energy dispersive X-ray (EDX) mapping analysis of  $\text{Ge}_3\text{N}_4\text{-rGO-80}$  composite.

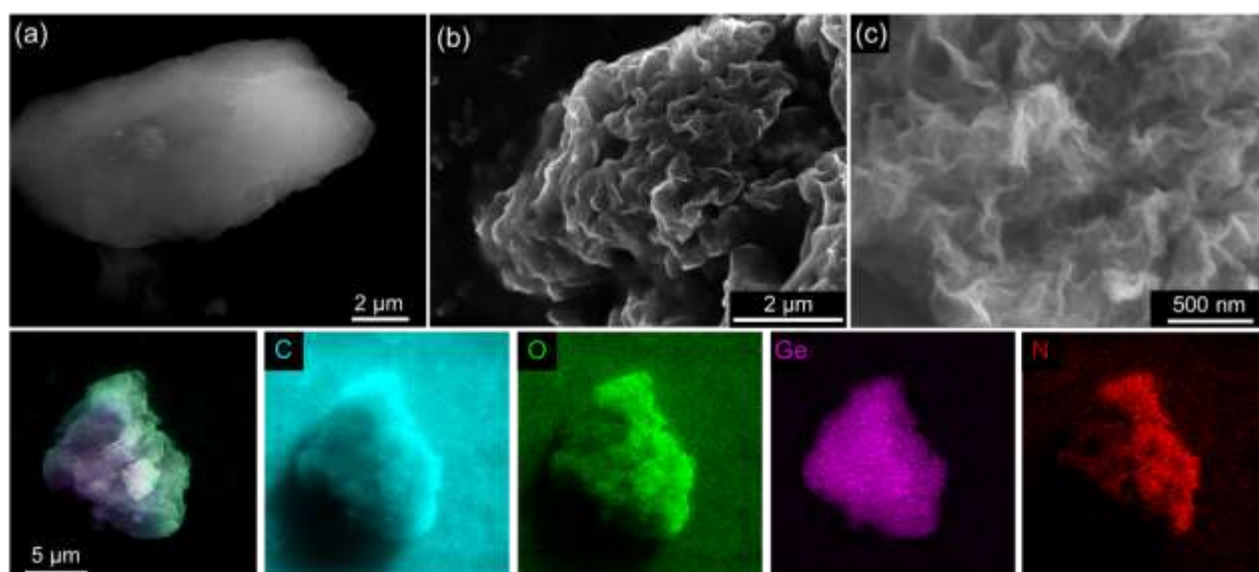

**Figure S4.** SEM images of  $\text{Ge}_3\text{N}_4\text{-rGO-20}$  and energy dispersive X-ray (EDX) mapping analysis of composite.

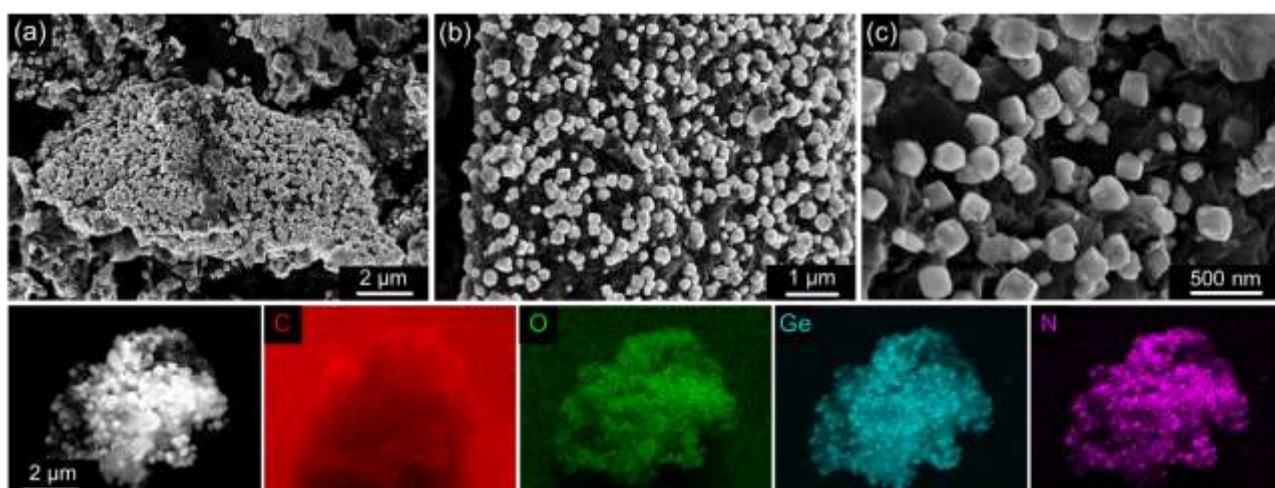

**Figure S5.** SEM images of  $\text{Ge}_3\text{N}_4\text{-rGO-50}$  and energy dispersive X-ray (EDX) mapping.

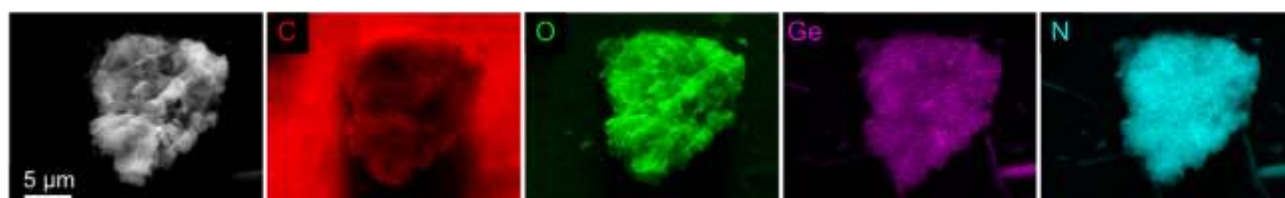

**Figure S6.** Energy dispersive X-ray (EDX) mapping analysis of  $\text{GeP-rGO-80}$  composite.

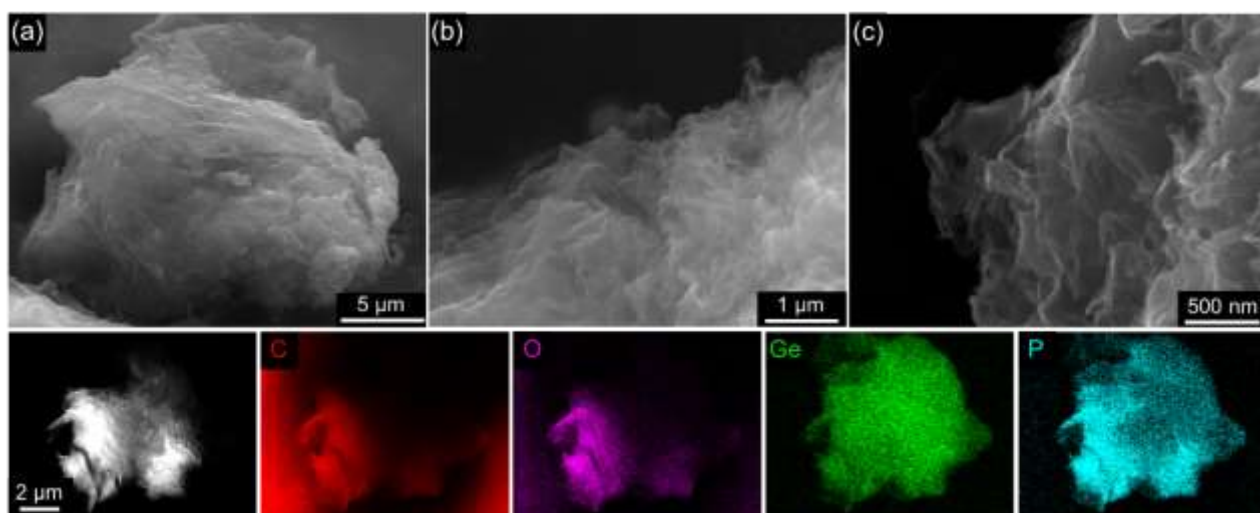

**Figure S7.** SEM images of GeP-rGO-20 and energy dispersive X-ray (EDX) mapping analysis of composite.

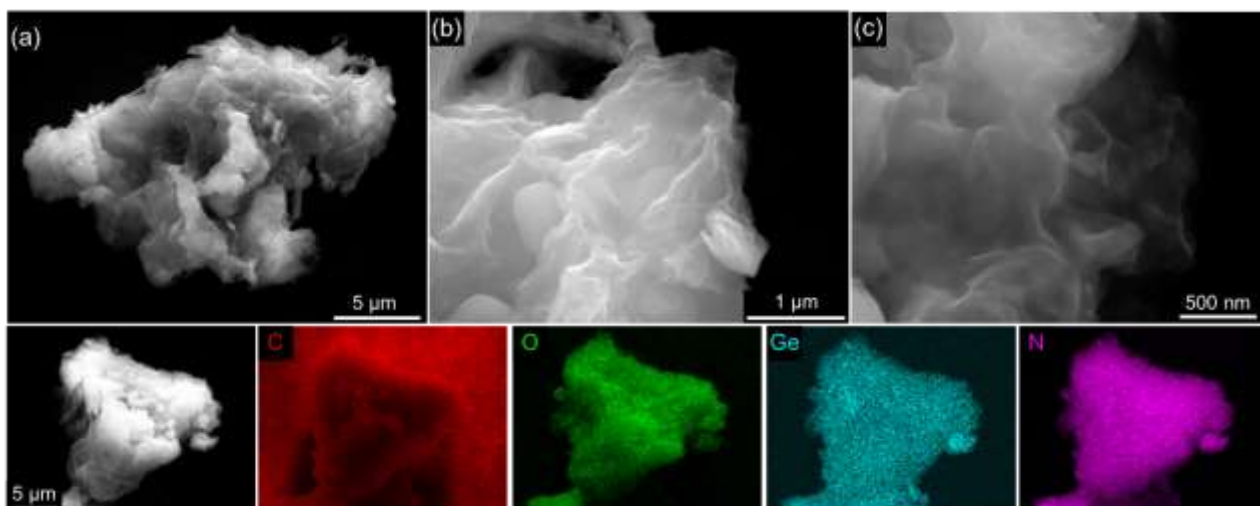

**Figure S8.** SEM images of GeP-rGO-50 and energy dispersive X-ray (EDX) mapping analysis of composite.

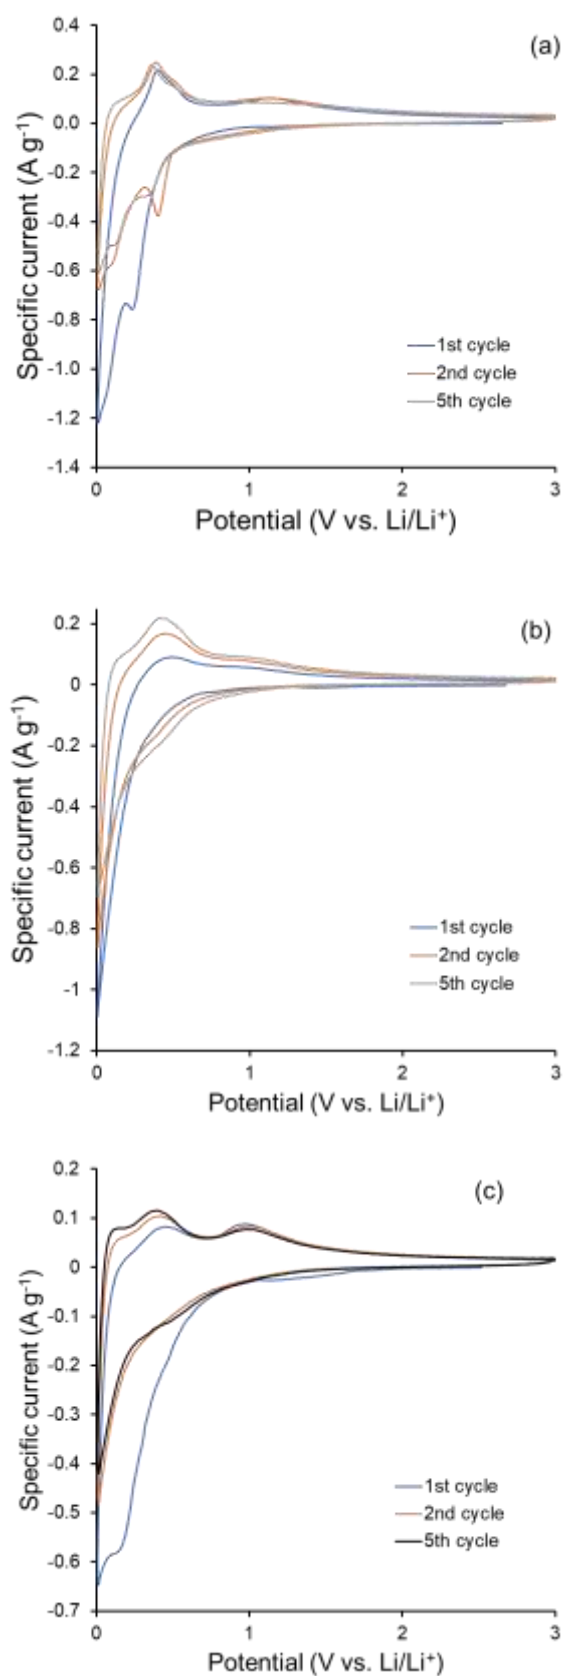

**Figure S9.** CV curves of  $\text{GeO}_2\text{-rGO-20}$  (a);  $\text{Ge}_3\text{N}_4\text{-rGO-20}$  (b) and  $\text{GeP-rGO-20}$  (c).

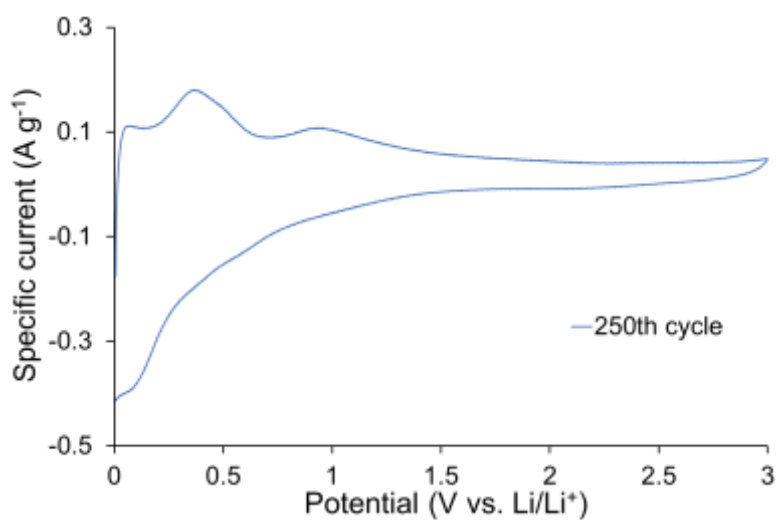

**Figure S10.** CV curve of  $\text{Ge}_3\text{N}_4\text{-rGO-80}$  after 250 discharge-charge cycles at  $100 \text{ mA g}^{-1}$  with scan rate  $0.1 \text{ mV s}^{-1}$  in the  $0.005\text{-}3.0 \text{ V}$  potential range vs.  $\text{Li/Li}^+$ .

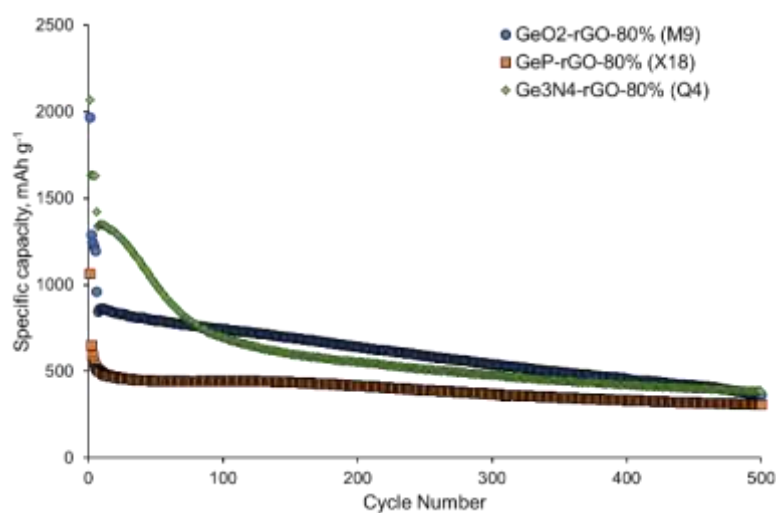

**Figure S11.** Electrode performance of  $\text{GeO}_2\text{-rGO-80}$ ,  $\text{Ge}_3\text{N}_4\text{-rGO-80}$  and  $\text{GeP-rGO-80}$  at rate of  $1000 \text{ mA g}^{-1}$  between  $0$  and  $3 \text{ V}$  vs  $\text{Li/Li}^+$ .



## Average voltage hysteresis

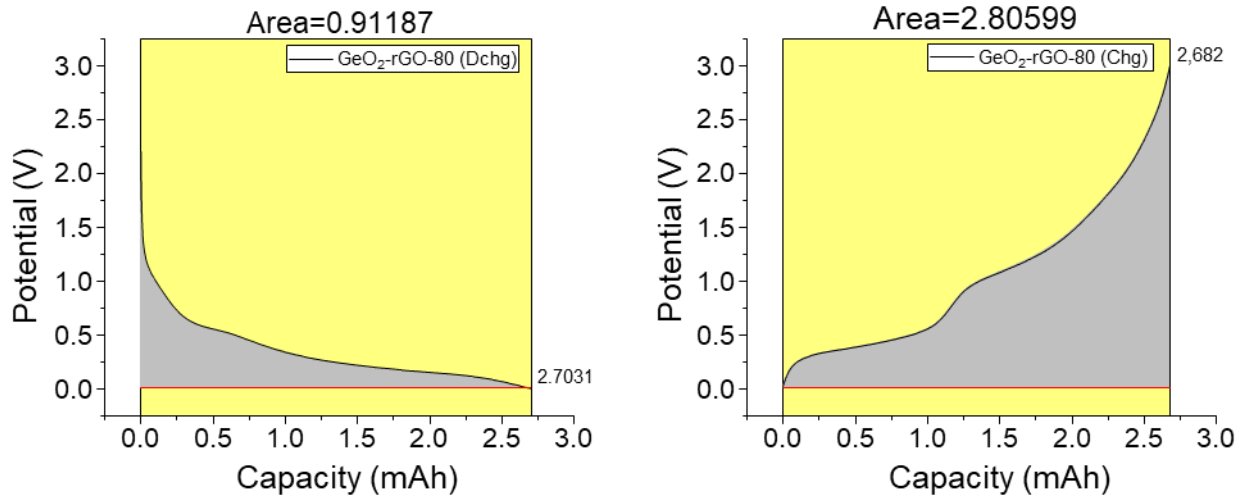

**Figure S12.** 35<sup>th</sup> discharge and charge curves of GeO<sub>2</sub>-rGO-80.

The average voltage hysteresis can be readily calculated from the galvanostatic curves of Figures 3d-f and S12.

$$\overline{\Delta V} = \frac{\int_{charging} V dq}{Q_{charging}} - \frac{\int_{discharging} V dq}{Q_{discharging}} \quad (S1)$$

The first and second terms on the right-hand side of Equation S1 correspond to the average charging and discharging voltage.  $q$  is the specific charge (Coul) and the integral  $Q = \int dq$  is the overall specific charge capacity.  $\overline{\Delta V}$  was calculated at the 30<sup>th</sup> cycle (the anodes were cycled between 0.005 and 3.0 V at 100 mA g<sup>-1</sup>).
